# Supplementary material for: Use of sodium glucose cotransporter 2 inhibitors and risk of major cardiovascular events and heart failure: Scandinavian register based cohort study
Source: PubMed Central journal article supplement — BMJ. 2019 Aug 29;366:l4772. doi: 10.1136/bmj.l4772 (PMC6713906; doi:10.1136/bmj.l4772), 2019-08-29
Supplement: pasb049944.ww.pdf [file pasb049944.ww.pdf]

## SUPPLEMENTARY APPENDIX

### Use of sodium glucose cotransporter 2 inhibitors and risk of major cardiovascular events and heart failure: Scandinavian register based cohort study

Björn Pasternak; Peter Ueda; Björn Eliasson; Ann-Marie Svensson; Stefan Franzén; Soffia Gudbjörnsdóttir; Kristian Hveem; Christian Jonasson; Viktor Wintzell; Mads Melbye; Henrik Svanström.

#### Table of contents

|                                                                                                                                                                                                                                      | Page |
|--------------------------------------------------------------------------------------------------------------------------------------------------------------------------------------------------------------------------------------|------|
| <b>WebTable 1.</b> Exclusion criteria                                                                                                                                                                                                | 2    |
| <b>WebTable 2.</b> Data sources                                                                                                                                                                                                      | 3    |
| <b>WebTable 3.</b> Variables included in propensity score, with definitions                                                                                                                                                          | 4    |
| <b>WebTable 4.</b> Definitions of history of major cardiovascular disease and heart failure                                                                                                                                          | 6    |
| <b>WebTable 5.</b> ICD-10 codes for outcome definitions                                                                                                                                                                              | 7    |
| <b>WebTable 6.</b> Distribution of variables from the Swedish National Diabetes Register in the Swedish part of the matched cohort of SGLT2 inhibitor and DPP4 inhibitor users                                                       | 8    |
| <b>WebTable 7.</b> Baseline characteristics of new users of SGLT2 inhibitors and DPP4 inhibitors in overall cohort (Denmark, Norway, and Sweden), April, 2013, through December, 2016, before matching                               | 9    |
| <b>WebTable 8.</b> Baseline characteristics of new users of SGLT2 inhibitors and DPP4 inhibitors in Denmark, April, 2013, through December, 2016, before matching.                                                                   | 11   |
| <b>WebTable 9.</b> Baseline characteristics of new users of SGLT2 inhibitors and DPP4 inhibitors in Norway, April, 2013, through December, 2016, before matching.                                                                    | 13   |
| <b>WebTable 10.</b> Baseline characteristics of new users of SGLT2 inhibitors and DPP4 inhibitors in Sweden, April, 2013, through December, 2016, before matching.                                                                   | 15   |
| <b>WebTable 11.</b> Distribution of person-years of follow-up by individual DPP4 inhibitors                                                                                                                                          | 17   |
| <b>WebTable 12.</b> Reasons for censoring in analyses of co-primary outcomes                                                                                                                                                         | 18   |
| <b>WebTable 13.</b> Risk of co-primary outcomes associated with use of SGLT2 inhibitors, compared with DPP4 inhibitors, according to study country                                                                                   | 19   |
| <b>WebTable 14.</b> Multiple imputation estimates of hazard ratios for major cardiovascular events and heart failure associated with use of SGLT2 inhibitors, HbA1c, blood pressure, eGFR, albuminuria, body mass index, and smoking | 20   |
| <b>WebTable 15.</b> Post-hoc sensitivity analyses                                                                                                                                                                                    | 21   |
| <b>WebTable 16.</b> Supplementary serious adverse event outcomes                                                                                                                                                                     | 22   |

**WebTable 1.** Exclusion criteria

| <b>Exclusion criterion</b>                                                                                                                                                                                                                                     | <b>Codes (ICD-10, NCSP, or ATC)</b>                                                                                                                               |
|----------------------------------------------------------------------------------------------------------------------------------------------------------------------------------------------------------------------------------------------------------------|-------------------------------------------------------------------------------------------------------------------------------------------------------------------|
| Dialysis or renal transplantation at any time before index date <sup>a</sup>                                                                                                                                                                                   | ICD-10: Z49.x, Z94.0, Z99.2<br>NCSP: KAS (all countries);<br>BJFD, BJFZ (Denmark only);<br>DR012-DR016, DR023, DR024, DR055, DR056,<br>DR060, DR061 (Sweden only) |
| End-stage illness (severe malnutrition, cachexia, dementia, coma) at any time before index date <sup>a</sup>                                                                                                                                                   | ICD-10: E40.x-E43.x, F00.x-F03.x, G30.x, R40.2, R64.x; ATC: N06D                                                                                                  |
| Drug misuse within last year                                                                                                                                                                                                                                   | ICD-10: F11.x-F16.x, F18.x, F19.x, R78.1-R78.5, T40.x; ATC: N07BB, N07BC                                                                                          |
| Major pancreatic disease (chronic pancreatitis [defined by pancreatic enzyme substitution prescription within last year or diagnosis at any time before index date], pancreatic cancer, major pancreatic surgery at any time before index date <sup>a</sup> )  | ICD-10: C25.x, K86.0, K86.1; NCSP: JLC, JLE; ATC: A09AA02                                                                                                         |
| No prescription drug or register entry in the national patient register within 1 year before index date                                                                                                                                                        | n.a.                                                                                                                                                              |
| Any-cause hospitalization within 30 days before index date                                                                                                                                                                                                     | n.a.                                                                                                                                                              |
| Abbreviations: ATC, Anatomical Therapeutic Chemical; ICD, International Classification of Diseases; NCSP, NOMESCO Classification of Surgical Procedures.<br><sup>a</sup> 10-year lookback in Danish and Swedish datasets, 5-year lookback in Norwegian dataset |                                                                                                                                                                   |

**WebTable 2.** Data sources

|                                                       | Registers                                                                                                                                            | Data                                                                                                                                                               |
|-------------------------------------------------------|------------------------------------------------------------------------------------------------------------------------------------------------------|--------------------------------------------------------------------------------------------------------------------------------------------------------------------|
| Prescription registers                                | -Danish National Prescription Registry<br>-Norwegian Prescription Database (NorPD)<br>-Swedish Prescribed Drug Register                              | Filled prescriptions from all pharmacies in the respective countries; data on specific drug entity, date of dispense, amount of drug                               |
| Patient registers                                     | -Danish National Patient Register<br>-Norwegian Patient Registry<br>-Swedish National Patient Register                                               | Diagnoses and procedures from all specialist care (in-hospital and outpatient) in the respective countries; data on ICD-10 codes, procedure codes, date of contact |
| Population registers<br>Central bureaus of statistics | -Danish Civil Registration System<br>-Statistics Denmark<br>-Norwegian National Registry<br>-Swedish Total Population Register<br>-Statistics Sweden | Nationwide demographic information, vital status, socioeconomic variables                                                                                          |
| Cause of death registers                              | -Danish Register of Causes of Death<br>-Norwegian Cause of Death Registry<br>-Swedish Cause of Death Register                                        | Nationwide cause of death data based on death certificates, classified according to ICD-10                                                                         |
| Diabetes register                                     | -Swedish National Diabetes Register                                                                                                                  | Swedish nationwide clinical information regarding patients with type 2 diabetes, e.g. HbA1c, eGFR, albuminuria, smoking                                            |

**WebTable 3.** Variables included in propensity score, with definitions

| Variable                                                                                                                         | Codes                                                                                                                                                                                                                                                                      |
|----------------------------------------------------------------------------------------------------------------------------------|----------------------------------------------------------------------------------------------------------------------------------------------------------------------------------------------------------------------------------------------------------------------------|
| <b>Demographic and socioeconomic characteristics</b>                                                                             |                                                                                                                                                                                                                                                                            |
| Sex                                                                                                                              |                                                                                                                                                                                                                                                                            |
| Age group (5-year age bands)                                                                                                     |                                                                                                                                                                                                                                                                            |
| Place of birth (Scandinavia, <sup>a</sup> Rest of Europe, Outside Europe)                                                        |                                                                                                                                                                                                                                                                            |
| Civil status (Married/living with partner, Single)                                                                               |                                                                                                                                                                                                                                                                            |
| Education <sup>b</sup> (Primary-/secondary school/vocational training, Short tertiary education, Medium/long tertiary education) |                                                                                                                                                                                                                                                                            |
| <b>Comorbidities</b>                                                                                                             | <i>ICD-10/NCSP code</i>                                                                                                                                                                                                                                                    |
| Acute coronary syndrome                                                                                                          | I20.0, I21.x, I22.x                                                                                                                                                                                                                                                        |
| Other ischemic heart disease                                                                                                     | I11.x (not I11.0), I20.x (not I20.0), I24.x, I25.x                                                                                                                                                                                                                         |
| Heart failure/cardiomyopathy                                                                                                     | I11.0, I13.0, I13.2, I42.x, I43.x, I50.x, J81.x                                                                                                                                                                                                                            |
| Valve disorders                                                                                                                  | I34.x-I37.x                                                                                                                                                                                                                                                                |
| Stroke                                                                                                                           | I60.x-I64.x                                                                                                                                                                                                                                                                |
| Other cerebrovascular disease                                                                                                    | G45.x (not G45.4), G46.x, I65.x-I69.x                                                                                                                                                                                                                                      |
| Atrial fibrillation                                                                                                              | I48.x                                                                                                                                                                                                                                                                      |
| Other arrhythmia                                                                                                                 | I44.x-I47.x, I49.x                                                                                                                                                                                                                                                         |
| Coronary revascularization in the past year                                                                                      | NCSP: FNA-FNE, FNG, FNP02, FNP12, FNQ05, FNQ12, FNR22                                                                                                                                                                                                                      |
| Other cardiac surgery/invasive procedure in the past year                                                                        | NCSP: DF020, Fxx (not FNA-FNE, FNG, FNP02, FNP12, FNQ05, FNQ12, FNR22)                                                                                                                                                                                                     |
| COPD                                                                                                                             | J44.x                                                                                                                                                                                                                                                                      |
| Other lung disease                                                                                                               | E66.2, I27.x, J40.x-J43.x, J45.x-J47.x, J60.x-J70.x, <sup>c</sup> J84.x, J92.x, J96.x, J98.2, J98.3, R09.2, Z99.x; NCSP: GBB                                                                                                                                               |
| Venous thromboembolism                                                                                                           | I26.x, I80.x (not I80.0), I81.x, I82.0, I82.2-I82.9                                                                                                                                                                                                                        |
| Cancer                                                                                                                           | C00.x-C97.x (not C44.x)                                                                                                                                                                                                                                                    |
| Liver disease                                                                                                                    | B18.x, I85.0, I85.9, I98.2, K70.x-K77.x                                                                                                                                                                                                                                    |
| Rheumatic disease                                                                                                                | M05.x-M09.x, M30.x-M34.x, M35.1, M35.3, M45.x                                                                                                                                                                                                                              |
| Psychiatric disorder                                                                                                             | F04.x-F10.x, F20.x-F99.x                                                                                                                                                                                                                                                   |
| Fracture in the past year                                                                                                        | M48.4, M48.5, M84.3, S02.x (not S02.5), S12.x, S22.x, S32.x, S42.x, S52.x, S62.x, S72.x, S82.x, S92.x, T02.x, T08.x, T10.x, T12.x                                                                                                                                          |
| Arterial disease (including amputation)                                                                                          | E11.5, E13.5, E14.5, I65.x, I70.x, I72.x-I74.x, I77.x, K55.0, K55.1; NCSP: NFQ, NGQ, NHQ                                                                                                                                                                                   |
| Renal disease                                                                                                                    | E11.2, E13.2, E14.2, I12.x, I13.x, N00.x-N08.x, N17.x-N19.x, N25.x- N27.x                                                                                                                                                                                                  |
| Diabetic complications                                                                                                           | E11.0, E11.1, E11.3, E11.4, E11.6-E11.8, E13.0, E13.1, E13.3, E13.4, E13.6-E13.8, E14.0, E14.1, E14.3, E14.4, E14.6-E14.8, E16.0-E16.2, G59.0, G63.2, G99.0, H28.0, <sup>d</sup> H35.8, H36.0, L98.4, M14.2, M14.6, M90.8<br>NCSP: CKC10, CKC12, CKC15, CKD65 <sup>e</sup> |

|                                                                                                                                                                                                                                                                                                                                                                                                                                                                                                                                                                                                                                                                                                                                                                                                                                                                                                                                                                                                                                                                                                                                                                                                                       |                                                                                                  |
|-----------------------------------------------------------------------------------------------------------------------------------------------------------------------------------------------------------------------------------------------------------------------------------------------------------------------------------------------------------------------------------------------------------------------------------------------------------------------------------------------------------------------------------------------------------------------------------------------------------------------------------------------------------------------------------------------------------------------------------------------------------------------------------------------------------------------------------------------------------------------------------------------------------------------------------------------------------------------------------------------------------------------------------------------------------------------------------------------------------------------------------------------------------------------------------------------------------------------|--------------------------------------------------------------------------------------------------|
| <b>Hospitalizations and outpatient visits in the past year</b>                                                                                                                                                                                                                                                                                                                                                                                                                                                                                                                                                                                                                                                                                                                                                                                                                                                                                                                                                                                                                                                                                                                                                        |                                                                                                  |
| Hospitalization due to cardiovascular causes                                                                                                                                                                                                                                                                                                                                                                                                                                                                                                                                                                                                                                                                                                                                                                                                                                                                                                                                                                                                                                                                                                                                                                          |                                                                                                  |
| Hospitalization due to type 2 diabetes                                                                                                                                                                                                                                                                                                                                                                                                                                                                                                                                                                                                                                                                                                                                                                                                                                                                                                                                                                                                                                                                                                                                                                                |                                                                                                  |
| Hospitalization due to other causes                                                                                                                                                                                                                                                                                                                                                                                                                                                                                                                                                                                                                                                                                                                                                                                                                                                                                                                                                                                                                                                                                                                                                                                   |                                                                                                  |
| Outpatient visit due to cardiovascular causes                                                                                                                                                                                                                                                                                                                                                                                                                                                                                                                                                                                                                                                                                                                                                                                                                                                                                                                                                                                                                                                                                                                                                                         |                                                                                                  |
| Outpatient visit due to type 2 diabetes                                                                                                                                                                                                                                                                                                                                                                                                                                                                                                                                                                                                                                                                                                                                                                                                                                                                                                                                                                                                                                                                                                                                                                               |                                                                                                  |
| Outpatient visit due to other causes                                                                                                                                                                                                                                                                                                                                                                                                                                                                                                                                                                                                                                                                                                                                                                                                                                                                                                                                                                                                                                                                                                                                                                                  |                                                                                                  |
| <b>Diabetes drugs in the past 6 months</b>                                                                                                                                                                                                                                                                                                                                                                                                                                                                                                                                                                                                                                                                                                                                                                                                                                                                                                                                                                                                                                                                                                                                                                            | <i>ATC code</i>                                                                                  |
| Metformin                                                                                                                                                                                                                                                                                                                                                                                                                                                                                                                                                                                                                                                                                                                                                                                                                                                                                                                                                                                                                                                                                                                                                                                                             | A10BA02, A10BD02, A10BD03, A10BD05, A10BD07, A10BD08, A10BD10, A10BD11, A10BD13-A10BD16, A10BD20 |
| Sulphonylureas                                                                                                                                                                                                                                                                                                                                                                                                                                                                                                                                                                                                                                                                                                                                                                                                                                                                                                                                                                                                                                                                                                                                                                                                        | A10BB, A10BD01, A10BD02, A10BD04, A10BD06                                                        |
| Insulin                                                                                                                                                                                                                                                                                                                                                                                                                                                                                                                                                                                                                                                                                                                                                                                                                                                                                                                                                                                                                                                                                                                                                                                                               | A10AB, A10AC, A10AD, A10AE                                                                       |
| GLP1 receptor agonists                                                                                                                                                                                                                                                                                                                                                                                                                                                                                                                                                                                                                                                                                                                                                                                                                                                                                                                                                                                                                                                                                                                                                                                                | A10BJ01, A10BJ02, A10BJ03, A10BJ05, A10AE56                                                      |
| Other antidiabetics (glitazones, glinides, acarbose)                                                                                                                                                                                                                                                                                                                                                                                                                                                                                                                                                                                                                                                                                                                                                                                                                                                                                                                                                                                                                                                                                                                                                                  | A10BG, A10BX, A10BD03-A10BD06, A10BD09, A10BD14, A10BF01                                         |
| No diabetes drug                                                                                                                                                                                                                                                                                                                                                                                                                                                                                                                                                                                                                                                                                                                                                                                                                                                                                                                                                                                                                                                                                                                                                                                                      |                                                                                                  |
| <b>Time since first diabetes drug (&lt;1, 1-2, 3-4, 5-6, ≥7)</b>                                                                                                                                                                                                                                                                                                                                                                                                                                                                                                                                                                                                                                                                                                                                                                                                                                                                                                                                                                                                                                                                                                                                                      |                                                                                                  |
| <b>Other drugs in the past year</b>                                                                                                                                                                                                                                                                                                                                                                                                                                                                                                                                                                                                                                                                                                                                                                                                                                                                                                                                                                                                                                                                                                                                                                                   | <i>ATC code</i>                                                                                  |
| ARB/ACE-I                                                                                                                                                                                                                                                                                                                                                                                                                                                                                                                                                                                                                                                                                                                                                                                                                                                                                                                                                                                                                                                                                                                                                                                                             | C09A-C09D                                                                                        |
| Calcium-channel blocker                                                                                                                                                                                                                                                                                                                                                                                                                                                                                                                                                                                                                                                                                                                                                                                                                                                                                                                                                                                                                                                                                                                                                                                               | C08C, C08D                                                                                       |
| Loop diuretic <sup>b</sup>                                                                                                                                                                                                                                                                                                                                                                                                                                                                                                                                                                                                                                                                                                                                                                                                                                                                                                                                                                                                                                                                                                                                                                                            | C03C, C03EB                                                                                      |
| Other diuretic <sup>b</sup>                                                                                                                                                                                                                                                                                                                                                                                                                                                                                                                                                                                                                                                                                                                                                                                                                                                                                                                                                                                                                                                                                                                                                                                           | C03A, C03B, C03D, C03EA                                                                          |
| Beta-blocker                                                                                                                                                                                                                                                                                                                                                                                                                                                                                                                                                                                                                                                                                                                                                                                                                                                                                                                                                                                                                                                                                                                                                                                                          | C07                                                                                              |
| Digoxin                                                                                                                                                                                                                                                                                                                                                                                                                                                                                                                                                                                                                                                                                                                                                                                                                                                                                                                                                                                                                                                                                                                                                                                                               | C01AA05                                                                                          |
| Nitrate                                                                                                                                                                                                                                                                                                                                                                                                                                                                                                                                                                                                                                                                                                                                                                                                                                                                                                                                                                                                                                                                                                                                                                                                               | C01DA                                                                                            |
| Platelet inhibitors                                                                                                                                                                                                                                                                                                                                                                                                                                                                                                                                                                                                                                                                                                                                                                                                                                                                                                                                                                                                                                                                                                                                                                                                   | B01AC                                                                                            |
| Anticoagulant                                                                                                                                                                                                                                                                                                                                                                                                                                                                                                                                                                                                                                                                                                                                                                                                                                                                                                                                                                                                                                                                                                                                                                                                         | B01AA, B01AF, B01AE07, B01AX05                                                                   |
| Lipid lowering drug                                                                                                                                                                                                                                                                                                                                                                                                                                                                                                                                                                                                                                                                                                                                                                                                                                                                                                                                                                                                                                                                                                                                                                                                   | C10                                                                                              |
| Antidepressant                                                                                                                                                                                                                                                                                                                                                                                                                                                                                                                                                                                                                                                                                                                                                                                                                                                                                                                                                                                                                                                                                                                                                                                                        | N06A                                                                                             |
| Antipsychotic                                                                                                                                                                                                                                                                                                                                                                                                                                                                                                                                                                                                                                                                                                                                                                                                                                                                                                                                                                                                                                                                                                                                                                                                         | N05A                                                                                             |
| Anxiolytic, hypnotic, or sedative                                                                                                                                                                                                                                                                                                                                                                                                                                                                                                                                                                                                                                                                                                                                                                                                                                                                                                                                                                                                                                                                                                                                                                                     | N05B, N05C                                                                                       |
| Beta-2 agonist inhalant                                                                                                                                                                                                                                                                                                                                                                                                                                                                                                                                                                                                                                                                                                                                                                                                                                                                                                                                                                                                                                                                                                                                                                                               | R03AC                                                                                            |
| Anticholinergic inhalant                                                                                                                                                                                                                                                                                                                                                                                                                                                                                                                                                                                                                                                                                                                                                                                                                                                                                                                                                                                                                                                                                                                                                                                              | R03BB                                                                                            |
| Glucocorticoid inhalant                                                                                                                                                                                                                                                                                                                                                                                                                                                                                                                                                                                                                                                                                                                                                                                                                                                                                                                                                                                                                                                                                                                                                                                               | R03BA, R03AK                                                                                     |
| Oral glucocorticoid                                                                                                                                                                                                                                                                                                                                                                                                                                                                                                                                                                                                                                                                                                                                                                                                                                                                                                                                                                                                                                                                                                                                                                                                   | H02AB                                                                                            |
| NSAID                                                                                                                                                                                                                                                                                                                                                                                                                                                                                                                                                                                                                                                                                                                                                                                                                                                                                                                                                                                                                                                                                                                                                                                                                 | M01A                                                                                             |
| Opioid                                                                                                                                                                                                                                                                                                                                                                                                                                                                                                                                                                                                                                                                                                                                                                                                                                                                                                                                                                                                                                                                                                                                                                                                                | N02A                                                                                             |
| <b>Number of drugs used in the past year<sup>b</sup> (1-5, 6-10, 11-15, ≥16)</b>                                                                                                                                                                                                                                                                                                                                                                                                                                                                                                                                                                                                                                                                                                                                                                                                                                                                                                                                                                                                                                                                                                                                      |                                                                                                  |
| <p>Abbreviations: ACE-I, angiotensin converting enzyme inhibitor; ARB, angiotensin receptor blocker; ATC, Anatomical Therapeutic Chemical; COPD, chronic obstructive pulmonary disease; DDP4, dipeptidyl peptidase 4; ICD, International Classification of Diseases; NCSP, NOMESCO Classification of Surgical Procedures; NSAID, non-steroidal anti-inflammatory drug;<br/> The look-back for capture of comorbidities was 10 years in Swedish and Danish datasets and 5 years in Norwegian dataset. Diagnoses and procedures in any position and associated with any type of specialist care (inpatient and outpatient) were included.</p> <p><sup>a</sup>Defined as Scandinavian countries in Swedish and Danish datasets, and as Nordic countries in Norwegian dataset.<br/> <sup>b</sup>Variable available in Swedish and Danish datasets but not Norwegian dataset.<br/> <sup>c</sup>ICD-10 code J70.x available in Swedish and Danish datasets but not Norwegian dataset.<br/> <sup>d</sup>ICD-10 code H28.0 available in Swedish and Danish datasets but not Norwegian dataset.<br/> <sup>e</sup>NCSP codes CKC10, CKC12, CKC15, CKD65 available in Swedish and Danish datasets but not Norwegian dataset.</p> |                                                                                                  |

**WebTable 4.** Definitions of history of major cardiovascular disease and heart failure

| <b>Category</b>                                                                                                                                                                                                                                                                                                                                                                   | <b>Codes</b>                                                                                                                                                                                                |
|-----------------------------------------------------------------------------------------------------------------------------------------------------------------------------------------------------------------------------------------------------------------------------------------------------------------------------------------------------------------------------------|-------------------------------------------------------------------------------------------------------------------------------------------------------------------------------------------------------------|
| Major cardiovascular disease<br>(includes acute coronary syndrome, coronary revascularization, stroke, heart failure, and peripheral vascular disease)                                                                                                                                                                                                                            | ICD-10: E115.x, E135.x, E145.x, I11.0, I13.0, I13.2, I20.0, I21.x, I22.x, I42.x, I43.x, I50.x, I60.x-I65.x, I70.x, I72.x, I73.9, J81.x, K55.0, K55.1; NCSP: FNA-FNE, FNG, FNP02, FNP12, FNQ05, FNQ12, FNR22 |
| Heart failure                                                                                                                                                                                                                                                                                                                                                                     | ICD-10: I11.0, I13.0, I13.2, I42.x, I43.x, I50.x, J81.x,                                                                                                                                                    |
| Abbreviations: ICD, International Classification of Diseases; NCSP, NOMESCO Classification of Surgical Procedures.<br>The look-back for capture of comorbidities was 10 years in Swedish and Danish datasets and 5 years in Norwegian dataset. Diagnoses and procedures in any position and associated with any type of specialist care (inpatient and outpatient) were included. |                                                                                                                                                                                                             |

**WebTable 5.** ICD-10 codes for outcome definitions

| <b>Outcome</b>                                              | <b>ICD-10 codes (sources of data)</b>                                                                                    |
|-------------------------------------------------------------|--------------------------------------------------------------------------------------------------------------------------|
| Major cardiovascular events                                 | I21.x, I22.x, I60.x, I61.x, I63.x, I64.x (patient registers); I00.x-I99.x, R57.0, R96.0, R96.1 (cause of death register) |
| Heart failure                                               | ICD-10: I11.0, I13.0, I13.2, I50.x J81.x (patient registers and cause of death registers)                                |
| Myocardial infarction                                       | ICD-10: I21.x, I22.x (patient registers and cause of death registers)                                                    |
| Stroke                                                      | ICD-10: I60.x, I61.x, I63.x, I64.x (patient registers and cause of death registers)                                      |
| Cardiovascular death                                        | ICD-10: I00.x-I99.x, R57.0, R96.0, R96.1 (cause of death registers)                                                      |
| Any-cause death                                             | (population registers)                                                                                                   |
| Lower limb amputation (hip to toe level)                    | Procedure codes: NFQ09, NFQ19, NFQ99, NGQ09, NGQ19, NGQ99, NHQ0, NHQ1, NHQ99 (patient registers)                         |
| Diabetic ketoacidosis                                       | ICD-10: Sweden E110A, E111A; Denmark/Norway E111, E131, E141 (patient registers and cause of death registers)            |
| Abbreviation: ICD, International Classification of Diseases |                                                                                                                          |

**WebTable 6.** Distribution of variables from the Swedish National Diabetes Register in the Swedish part of the matched cohort of SGLT2 inhibitor and DPP4 inhibitor users. All values are n (%).

(the cohort was 1:1 matched on propensity score, age, sex, and history of major cardiovascular disease, but not on the variables from the Swedish National Diabetes Register)

| <b>Characteristic</b>                                                                                                  | <b>SGLT2 inhibitors<br/>(n=9125)</b> | <b>DPP4 inhibitors<br/>(n=9125)</b> |
|------------------------------------------------------------------------------------------------------------------------|--------------------------------------|-------------------------------------|
| <b>HbA1c (%)</b>                                                                                                       |                                      |                                     |
| ≤ 6.9                                                                                                                  | 450 (5)                              | 581 (6)                             |
| 7.0-7.8                                                                                                                | 1239 (14)                            | 1522 (17)                           |
| 7.9-8.7                                                                                                                | 1399 (15)                            | 1571 (17)                           |
| 8.8-9.6                                                                                                                | 1050 (12)                            | 866 (9)                             |
| ≥9.7                                                                                                                   | 1206 (13)                            | 936 (10)                            |
| Missing                                                                                                                | 3781 (41)                            | 3649 (40)                           |
| <b>Blood pressure (mmHg)</b>                                                                                           |                                      |                                     |
| SBP < 140 and DBP < 90                                                                                                 | 3945 (43)                            | 4130 (45)                           |
| SBP 140-159 or DBP 90-99                                                                                               | 2419 (27)                            | 2485 (27)                           |
| SBP ≥160 or DBP ≥100                                                                                                   | 780 (9)                              | 750 (8)                             |
| Missing                                                                                                                | 1981 (22)                            | 1760 (19)                           |
| <b>Albuminuria</b>                                                                                                     |                                      |                                     |
| Normalalbuminuria                                                                                                      | 4059 (44)                            | 4163 (46)                           |
| Microalbuminuria                                                                                                       | 1207 (13)                            | 1147 (13)                           |
| Macroalbuminuria                                                                                                       | 310 (3)                              | 372 (4)                             |
| Missing                                                                                                                | 3549 (39)                            | 3443 (38)                           |
| <b>eGFR (ml/min)</b>                                                                                                   |                                      |                                     |
| ≥90                                                                                                                    | 3276 (36)                            | 2969 (33)                           |
| ≥60 to 89                                                                                                              | 2843 (31)                            | 2780 (30)                           |
| <60                                                                                                                    | 569 (6)                              | 1116 (12)                           |
| Missing                                                                                                                | 2437 (27)                            | 2260 (25)                           |
| <b>Body mass index (kg/m<sup>2</sup>)</b>                                                                              |                                      |                                     |
| <25                                                                                                                    | 420 (5)                              | 560 (6)                             |
| 25-29                                                                                                                  | 1901 (21)                            | 2317 (25)                           |
| 30-34                                                                                                                  | 2430 (27)                            | 2319 (25)                           |
| ≥35                                                                                                                    | 1884 (21)                            | 1600 (18)                           |
| Missing                                                                                                                | 2490 (27)                            | 2329 (26)                           |
| <b>Current smoking</b>                                                                                                 |                                      |                                     |
| No                                                                                                                     | 5486 (60)                            | 5667 (62)                           |
| Yes                                                                                                                    | 959 (11)                             | 1015 (11)                           |
| Missing                                                                                                                | 2680 (29)                            | 2443 (27)                           |
| Abbreviations: SBP, systolic blood pressure; DBP, diastolic blood pressure; eGFR, estimated glomerular filtration rate |                                      |                                     |



**WebTable 7.** Baseline characteristics of new users of SGLT2 inhibitors and DPP4 inhibitors in **overall cohort (Denmark, Norway, and Sweden)**, April, 2013, through December, 2016, **before matching**. All values are n (%) unless stated otherwise.

| <b>Characteristic</b>                                        | <b>SGLT2 inhibitors<br/>(n=25,988)</b> | <b>DPP4 inhibitors<br/>(n=94,411)</b> |
|--------------------------------------------------------------|----------------------------------------|---------------------------------------|
| Male sex                                                     | 15,748 (61)                            | 57,036 (60)                           |
| Age, mean (SD)                                               | 61 (10)                                | 64 (11)                               |
| Country                                                      |                                        |                                       |
| Sweden                                                       | 10,515 (40)                            | 42,399 (45)                           |
| Denmark                                                      | 8326 (32)                              | 27,084 (29)                           |
| Norway                                                       | 7147 (28)                              | 24,928 (26)                           |
| Place of birth                                               |                                        |                                       |
| Scandinavia                                                  | 22,063 (85)                            | 78,064 (83)                           |
| Rest of Europe                                               | 1606 (6)                               | 6409 (7)                              |
| Outside Europe                                               | 2284 (9)                               | 9793 (10)                             |
| Missing                                                      | 35 (0)                                 | 145 (0)                               |
| Civil status                                                 |                                        |                                       |
| Married/living with partner                                  | 14,892 (57)                            | 54,254 (57)                           |
| Single                                                       | 11,053 (43)                            | 39,767 (42)                           |
| Missing                                                      | 43 (0)                                 | 390 (0)                               |
| Education                                                    |                                        |                                       |
| Primary-/secondary school/vocational training <sup>a</sup>   | 14,763 (78)                            | 55,093 (79)                           |
| Short tertiary education                                     | 1390 (7)                               | 4696 (7)                              |
| Medium or long tertiary education                            | 2283 (12)                              | 7614 (11)                             |
| Missing                                                      | 405 (2)                                | 2080 (3)                              |
| Year of cohort entry <sup>b</sup>                            |                                        |                                       |
| 2013                                                         | 1773 (7)                               | 16,155 (17)                           |
| 2014                                                         | 5418 (21)                              | 23,490 (25)                           |
| 2015                                                         | 7599 (29)                              | 26,701 (28)                           |
| 2016                                                         | 11,198 (43)                            | 28,065 (30)                           |
| <b>Comorbidities</b>                                         |                                        |                                       |
| Acute coronary syndrome                                      | 1959 (8)                               | 6703 (7)                              |
| Other ischemic heart disease                                 | 4685 (18)                              | 15,654 (17)                           |
| Heart failure/cardiomyopathy                                 | 1485 (6)                               | 6137 (7)                              |
| Valve disorders                                              | 548 (2)                                | 2819 (3)                              |
| Stroke                                                       | 919 (4)                                | 4091 (4)                              |
| Other cerebrovascular disease                                | 1083 (4)                               | 4612 (5)                              |
| Atrial fibrillation                                          | 1748 (7)                               | 7800 (8)                              |
| Other arrhythmia                                             | 1126 (4)                               | 4294 (5)                              |
| Coronary revascularization in the past year                  | 338 (1)                                | 1210 (1)                              |
| Other cardiac surgery or invasive procedure in the past year | 149 (1)                                | 640 (1)                               |
| COPD                                                         | 995 (4)                                | 4089 (4)                              |
| Other lung disease                                           | 1837 (7)                               | 6403 (7)                              |
| Venous thromboembolism                                       | 602 (2)                                | 2234 (2)                              |
| Cancer                                                       | 1623 (6)                               | 7977 (8)                              |
| Liver disease                                                | 531 (2)                                | 1756 (2)                              |
| Rheumatic disease                                            | 759 (3)                                | 3188 (3)                              |
| Psychiatric disorder                                         | 2555 (10)                              | 8591 (9)                              |
| Fracture in the past year                                    | 411 (2)                                | 1637 (2)                              |
| Arterial disease (including amputation)                      | 1798 (7)                               | 5721 (6)                              |
| Renal disease                                                | 1263 (5)                               | 5955 (6)                              |

|                                                                                                                                                                                                                                                                                          |             |             |
|------------------------------------------------------------------------------------------------------------------------------------------------------------------------------------------------------------------------------------------------------------------------------------------|-------------|-------------|
| Diabetic complications                                                                                                                                                                                                                                                                   | 8,715 (34)  | 21,722 (23) |
| <b>Hospitalizations and outpatient visits in the past year</b>                                                                                                                                                                                                                           |             |             |
| Hospitalization due to cardiovascular causes                                                                                                                                                                                                                                             | 1044 (4)    | 4454 (5)    |
| Hospitalization due to type 2 diabetes                                                                                                                                                                                                                                                   | 234 (1)     | 749 (1)     |
| Hospitalization due to other causes                                                                                                                                                                                                                                                      | 3191 (12)   | 12,535 (13) |
| Outpatient visit due to cardiovascular causes                                                                                                                                                                                                                                            | 2535 (10)   | 9500 (10)   |
| Outpatient visit due to type 2 diabetes                                                                                                                                                                                                                                                  | 6761 (26)   | 15,474 (16) |
| Outpatient visit due to other causes                                                                                                                                                                                                                                                     | 14,808 (57) | 51,580 (55) |
| <b>Diabetes drugs in the past 6 months</b>                                                                                                                                                                                                                                               |             |             |
| Metformin                                                                                                                                                                                                                                                                                | 20,791 (80) | 75,416 (80) |
| Sulphonylureas                                                                                                                                                                                                                                                                           | 5218 (20)   | 22,388 (24) |
| Insulin                                                                                                                                                                                                                                                                                  | 9601 (37)   | 14,645 (16) |
| GLP1 receptor agonists                                                                                                                                                                                                                                                                   | 6808 (26)   | 2256 (2)    |
| Other antidiabetics (glitazones, glinides, acarbose)                                                                                                                                                                                                                                     | 843 (3)     | 2593 (3)    |
| No diabetes drug                                                                                                                                                                                                                                                                         | 1687 (6)    | 9385 (10)   |
| <b>Time since first diabetes drug, years</b>                                                                                                                                                                                                                                             |             |             |
| <1                                                                                                                                                                                                                                                                                       | 2590 (10)   | 14,538 (15) |
| 1-2                                                                                                                                                                                                                                                                                      | 2655 (10)   | 13,452 (14) |
| 3-4                                                                                                                                                                                                                                                                                      | 2828 (11)   | 14,001 (15) |
| 5-6                                                                                                                                                                                                                                                                                      | 3254 (13)   | 13,191 (14) |
| ≥7                                                                                                                                                                                                                                                                                       | 14,661 (56) | 39,229 (42) |
| <b>Other drugs in the past year</b>                                                                                                                                                                                                                                                      |             |             |
| ARB/ACE-I                                                                                                                                                                                                                                                                                | 17,765 (68) | 60,281 (64) |
| Calcium-channel blocker                                                                                                                                                                                                                                                                  | 7925 (30)   | 28,964 (31) |
| Loop diuretic <sup>a</sup>                                                                                                                                                                                                                                                               | 2757 (15)   | 10,844 (16) |
| Other diuretic <sup>a</sup>                                                                                                                                                                                                                                                              | 3481 (18)   | 12,672 (18) |
| Beta-blocker                                                                                                                                                                                                                                                                             | 9166 (35)   | 34,285 (36) |
| Digoxin                                                                                                                                                                                                                                                                                  | 493 (2)     | 2409 (3)    |
| Nitrate                                                                                                                                                                                                                                                                                  | 1871 (7)    | 6493 (7)    |
| Platelet inhibitors                                                                                                                                                                                                                                                                      | 9811 (38)   | 33,859 (36) |
| Anticoagulant                                                                                                                                                                                                                                                                            | 1765 (7)    | 8128 (9)    |
| Lipid lowering drug                                                                                                                                                                                                                                                                      | 18,137 (70) | 62,313 (66) |
| Antidepressant                                                                                                                                                                                                                                                                           | 4179 (16)   | 13,492 (14) |
| Antipsychotic                                                                                                                                                                                                                                                                            | 949 (4)     | 3570 (4)    |
| Anxiolytic, hypnotic, or sedative                                                                                                                                                                                                                                                        | 4456 (17)   | 16,737 (18) |
| Beta-2 agonist inhalant                                                                                                                                                                                                                                                                  | 2532 (10)   | 8140 (9)    |
| Anticholinergic inhalant                                                                                                                                                                                                                                                                 | 757 (3)     | 3290 (3)    |
| Glucocorticoid inhalant                                                                                                                                                                                                                                                                  | 2571 (10)   | 8658 (9)    |
| Oral glucocorticoid                                                                                                                                                                                                                                                                      | 1810 (7)    | 7704 (8)    |
| NSAID                                                                                                                                                                                                                                                                                    | 6888 (27)   | 21,139 (22) |
| Opioid                                                                                                                                                                                                                                                                                   | 5213 (20)   | 16,661 (18) |
| <b>Number of drugs used in the past year<sup>a</sup></b>                                                                                                                                                                                                                                 |             |             |
| 0-5                                                                                                                                                                                                                                                                                      | 3136 (17)   | 16,625 (24) |
| 6-10                                                                                                                                                                                                                                                                                     | 7538 (40)   | 27,932 (40) |
| 11-15                                                                                                                                                                                                                                                                                    | 5100 (27)   | 15,531 (22) |
| ≥16                                                                                                                                                                                                                                                                                      | 3067 (16)   | 9395 (14)   |
| Abbreviations: ACE-I, angiotensin converting enzyme inhibitor; ARB, angiotensin receptor blocker; COPD, chronic obstructive pulmonary disease; DDP4, dipeptidyl peptidase 4; NSAID, non-steroidal anti-inflammatory drug; SD, standard deviation; SGLT2 sodium-glucose co-transporter 2. |             |             |
| <sup>a</sup> Variable available in Denmark and Sweden but not Norway. n(%) reported for Denmark and Sweden alone.                                                                                                                                                                        |             |             |
| <sup>b</sup> Year of cohort entry was not included in the propensity score.                                                                                                                                                                                                              |             |             |

**WebTable 8.** Baseline characteristics of new users of SGLT2 inhibitors and DPP4 inhibitors in **Denmark**, April, 2013, through December, 2016, **before matching**. All values are n (%) unless stated otherwise.

| <b>Characteristic</b>                                          | <b>SGLT2 inhibitors<br/>(n=8326)</b> | <b>DPP4 inhibitors<br/>(n=27,084)</b> |
|----------------------------------------------------------------|--------------------------------------|---------------------------------------|
| Male sex                                                       | 5,035 (60)                           | 16,495 (61)                           |
| Age, mean (SD)                                                 | 60 (10)                              | 63 (11)                               |
| Place of birth                                                 |                                      |                                       |
| Scandinavia                                                    | 7,189 (86)                           | 22,831 (84)                           |
| Rest of Europe                                                 | 509 (6)                              | 1,756 (6)                             |
| Outside Europe                                                 | 593 (7)                              | 2,371 (9)                             |
| Missing                                                        | 35 (0)                               | 126 (0)                               |
| Civil status                                                   |                                      |                                       |
| Married/living with partner                                    | 5,497 (66)                           | 17,481 (65)                           |
| Single                                                         | 2,805 (34)                           | 9,400 (35)                            |
| Missing                                                        | 24 (0)                               | 203 (1)                               |
| Education                                                      |                                      |                                       |
| Primary-/secondary school/vocational training                  | 6,646 (80)                           | 21,652 (80)                           |
| Short tertiary education                                       | 302 (4)                              | 830 (3)                               |
| Medium or long tertiary education                              | 1,101 (13)                           | 3,415 (13)                            |
| Missing                                                        | 277 (3)                              | 1,187 (4)                             |
| Year of cohort entry <sup>a</sup>                              |                                      |                                       |
| 2013                                                           | 867 (10)                             | 5,122 (19)                            |
| 2014                                                           | 1,500 (18)                           | 7,080 (26)                            |
| 2015                                                           | 2,197 (26)                           | 7,515 (28)                            |
| 2016                                                           | 3,762 (45)                           | 7,367 (27)                            |
| <b>Comorbidities</b>                                           |                                      |                                       |
| Acute coronary syndrome                                        | 577 (7)                              | 1,771 (7)                             |
| Other ischemic heart disease                                   | 1,555 (19)                           | 4,478 (17)                            |
| Heart failure/cardiomyopathy                                   | 517 (6)                              | 1,709 (6)                             |
| Valve disorders                                                | 148 (2)                              | 727 (3)                               |
| Stroke                                                         | 353 (4)                              | 1,377 (5)                             |
| Other cerebrovascular disease                                  | 380 (5)                              | 1,406 (5)                             |
| Atrial fibrillation                                            | 556 (7)                              | 2,201 (8)                             |
| Other arrhythmia                                               | 364 (4)                              | 1,195 (4)                             |
| Coronary revascularization in the past year                    | 73 (1)                               | 309 (1)                               |
| Other cardiac surgery or invasive procedure in the past year   | 17 (0)                               | 85 (0)                                |
| COPD                                                           | 394 (5)                              | 1,438 (5)                             |
| Other lung disease                                             | 550 (7)                              | 1,714 (6)                             |
| Venous thromboembolism                                         | 234 (3)                              | 715 (3)                               |
| Cancer                                                         | 518 (6)                              | 2,159 (8)                             |
| Liver disease                                                  | 174 (2)                              | 533 (2)                               |
| Rheumatic disease                                              | 237 (3)                              | 870 (3)                               |
| Psychiatric disorder                                           | 495 (6)                              | 1,449 (5)                             |
| Fracture in the past year                                      | 114 (1)                              | 410 (2)                               |
| Arterial disease (including amputation)                        | 850 (10)                             | 2,122 (8)                             |
| Renal disease                                                  | 517 (6)                              | 1,850 (7)                             |
| Diabetic complications                                         | 3,204 (38)                           | 5,631 (21)                            |
| <b>Hospitalizations and outpatient visits in the past year</b> |                                      |                                       |

|                                                                                                                                                                                                                                                                                          |            |             |
|------------------------------------------------------------------------------------------------------------------------------------------------------------------------------------------------------------------------------------------------------------------------------------------|------------|-------------|
| Hospitalization due to cardiovascular causes                                                                                                                                                                                                                                             | 324 (4)    | 1,324 (5)   |
| Hospitalization due to type 2 diabetes                                                                                                                                                                                                                                                   | 109 (1)    | 275 (1)     |
| Hospitalization due to other causes                                                                                                                                                                                                                                                      | 1,270 (15) | 4,356 (16)  |
| Outpatient visit due to cardiovascular causes                                                                                                                                                                                                                                            | 626 (8)    | 2,137 (8)   |
| Outpatient visit due to type 2 diabetes                                                                                                                                                                                                                                                  | 2,229 (27) | 3,312 (12)  |
| Outpatient visit due to other causes                                                                                                                                                                                                                                                     | 4,941 (59) | 14,979 (55) |
| <b>Diabetes drugs in the past 6 months</b>                                                                                                                                                                                                                                               |            |             |
| Metformin                                                                                                                                                                                                                                                                                | 7,184 (86) | 23,615 (87) |
| Sulphonylureas                                                                                                                                                                                                                                                                           | 1,535 (18) | 5,937 (22)  |
| Insulin                                                                                                                                                                                                                                                                                  | 3,163 (38) | 2,350 (9)   |
| GLP1 receptor agonists                                                                                                                                                                                                                                                                   | 3,452 (41) | 942 (3)     |
| Other antidiabetics (glitazones, glinides, acarbose)                                                                                                                                                                                                                                     | 65 (1)     | 170 (1)     |
| No diabetes drug                                                                                                                                                                                                                                                                         | 334 (4)    | 1,855 (7)   |
| <b>Time since first diabetes drug, years</b>                                                                                                                                                                                                                                             |            |             |
| <1                                                                                                                                                                                                                                                                                       | 580 (7)    | 4,104 (15)  |
| 1-2                                                                                                                                                                                                                                                                                      | 690 (8)    | 4,057 (15)  |
| 3-4                                                                                                                                                                                                                                                                                      | 925 (11)   | 4,604 (17)  |
| 5-6                                                                                                                                                                                                                                                                                      | 1,161 (14) | 4,135 (15)  |
| ≥7                                                                                                                                                                                                                                                                                       | 4,970 (60) | 10,184 (38) |
| <b>Other drugs in the past year</b>                                                                                                                                                                                                                                                      |            |             |
| ARB/ACE-I                                                                                                                                                                                                                                                                                | 5,996 (72) | 17,591 (65) |
| Calcium-channel blocker                                                                                                                                                                                                                                                                  | 2,751 (33) | 8,547 (32)  |
| Loop diuretic                                                                                                                                                                                                                                                                            | 1,220 (15) | 4,129 (15)  |
| Other diuretic                                                                                                                                                                                                                                                                           | 1,830 (22) | 5,761 (21)  |
| Beta-blocker                                                                                                                                                                                                                                                                             | 2,334 (28) | 7,632 (28)  |
| Digoxin                                                                                                                                                                                                                                                                                  | 200 (2)    | 998 (4)     |
| Nitrate                                                                                                                                                                                                                                                                                  | 428 (5)    | 1,260 (5)   |
| Platelet inhibitors                                                                                                                                                                                                                                                                      | 3,413 (41) | 9,823 (36)  |
| Anticoagulant                                                                                                                                                                                                                                                                            | 554 (7)    | 2,319 (9)   |
| Lipid lowering drug                                                                                                                                                                                                                                                                      | 6,384 (77) | 19,678 (73) |
| Antidepressant                                                                                                                                                                                                                                                                           | 1,342 (16) | 3,822 (14)  |
| Antipsychotic                                                                                                                                                                                                                                                                            | 345 (4)    | 1,166 (4)   |
| Anxiolytic, hypnotic, or sedative                                                                                                                                                                                                                                                        | 868 (10)   | 3,120 (12)  |
| Beta-2 agonist inhalant                                                                                                                                                                                                                                                                  | 744 (9)    | 2,271 (8)   |
| Anticholinergic inhalant                                                                                                                                                                                                                                                                 | 217 (3)    | 936 (3)     |
| Glucocorticoid inhalant                                                                                                                                                                                                                                                                  | 683 (8)    | 2,177 (8)   |
| Oral glucocorticoid                                                                                                                                                                                                                                                                      | 405 (5)    | 1,770 (7)   |
| NSAID                                                                                                                                                                                                                                                                                    | 2,341 (28) | 6,490 (24)  |
| Opioid                                                                                                                                                                                                                                                                                   | 1,618 (19) | 4,590 (17)  |
| <b>Number of drugs used in the past year</b>                                                                                                                                                                                                                                             |            |             |
| 0-5                                                                                                                                                                                                                                                                                      | 1,497 (18) | 7,717 (28)  |
| 6-10                                                                                                                                                                                                                                                                                     | 3,589 (43) | 11,487 (42) |
| 11-15                                                                                                                                                                                                                                                                                    | 2,207 (27) | 5,381 (20)  |
| ≥16                                                                                                                                                                                                                                                                                      | 1,033 (12) | 2,499 (9)   |
| Abbreviations: ACE-I, angiotensin converting enzyme inhibitor; ARB, angiotensin receptor blocker; COPD, chronic obstructive pulmonary disease; DDP4, dipeptidyl peptidase 4; NSAID, non-steroidal anti-inflammatory drug; SD, standard deviation; SGLT2 sodium-glucose co-transporter 2. |            |             |
| ªYear of cohort entry was not included in the propensity score.                                                                                                                                                                                                                          |            |             |

**WebTable 9.** Baseline characteristics of new users of SGLT2 inhibitors and DPP4 inhibitors in **Norway**, April, 2013, through December, 2016, **before matching**. All values are n (%) unless stated otherwise.

| <b>Characteristic</b>                                          | <b>SGLT2 inhibitors<br/>(n=7147)</b> | <b>DPP4 inhibitors<br/>(n=24,928)</b> |
|----------------------------------------------------------------|--------------------------------------|---------------------------------------|
| Male sex                                                       | 4,118 (58)                           | 15,333 (62)                           |
| Age, mean (SD)                                                 | 60 (11)                              | 63 (11)                               |
| Place of birth                                                 |                                      |                                       |
| Scandinavia                                                    | 5,993 (84)                           | 20,984 (84)                           |
| Rest of Europe                                                 | 344 (5)                              | 1,069 (4)                             |
| Outside Europe                                                 | 810 (11)                             | 2,875 (12)                            |
| Missing                                                        | 0 (0)                                | 0 (0)                                 |
| Civil status                                                   |                                      |                                       |
| Married/living with partner                                    | 4,055 (57)                           | 13,988 (56)                           |
| Single                                                         | 3,092 (43)                           | 10,940 (44)                           |
| Missing                                                        | 0 (0)                                | 0 (0)                                 |
| Education                                                      |                                      |                                       |
| Primary-/secondary school/vocational training <sup>a</sup>     | -                                    | -                                     |
| Short tertiary education                                       | -                                    | -                                     |
| Medium or long tertiary education                              | -                                    | -                                     |
| Missing                                                        | -                                    | -                                     |
| Year of cohort entry <sup>b</sup>                              |                                      |                                       |
| 2013                                                           | 458 (6)                              | 5,059 (20)                            |
| 2014                                                           | 1,960 (27)                           | 6,970 (28)                            |
| 2015                                                           | 2,055 (29)                           | 6,585 (26)                            |
| 2016                                                           | 2,674 (37)                           | 6,314 (25)                            |
| <b>Comorbidities</b>                                           |                                      |                                       |
| Acute coronary syndrome                                        | 437 (6)                              | 1,474 (6)                             |
| Other ischemic heart disease                                   | 1,232 (17)                           | 4,066 (16)                            |
| Heart failure/cardiomyopathy                                   | 277 (4)                              | 1,328 (5)                             |
| Valve disorders                                                | 200 (3)                              | 1,011 (4)                             |
| Stroke                                                         | 157 (2)                              | 693 (3)                               |
| Other cerebrovascular disease                                  | 228 (3)                              | 1,007 (4)                             |
| Atrial fibrillation                                            | 396 (6)                              | 1,744 (7)                             |
| Other arrhythmia                                               | 321 (4)                              | 1,280 (5)                             |
| Coronary revascularization in the past year                    | 84 (1)                               | 332 (1)                               |
| Other cardiac surgery or invasive procedure in the past year   | 39 (1)                               | 192 (1)                               |
| COPD                                                           | 301 (4)                              | 1,179 (5)                             |
| Other lung disease                                             | 451 (6)                              | 1,598 (6)                             |
| Venous thromboembolism                                         | 88 (1)                               | 341 (1)                               |
| Cancer                                                         | 400 (6)                              | 1,899 (8)                             |
| Liver disease                                                  | 116 (2)                              | 410 (2)                               |
| Rheumatic disease                                              | 223 (3)                              | 870 (3)                               |
| Psychiatric disorder                                           | 701 (10)                             | 2,023 (8)                             |
| Fracture in the past year                                      | 103 (1)                              | 465 (2)                               |
| Arterial disease (including amputation)                        | 420 (6)                              | 1,553 (6)                             |
| Renal disease                                                  | 270 (4)                              | 1,822 (7)                             |
| Diabetic complications                                         | 2,133 (30)                           | 6,187 (25)                            |
| <b>Hospitalizations and outpatient visits in the past year</b> |                                      |                                       |

|                                                                                                                                                                                                                                                                                          |            |             |
|------------------------------------------------------------------------------------------------------------------------------------------------------------------------------------------------------------------------------------------------------------------------------------------|------------|-------------|
| Hospitalization due to cardiovascular causes                                                                                                                                                                                                                                             | 269 (4)    | 1,165 (5)   |
| Hospitalization due to type 2 diabetes                                                                                                                                                                                                                                                   | 56 (1)     | 170 (1)     |
| Hospitalization due to other causes                                                                                                                                                                                                                                                      | 811 (11)   | 3,255 (13)  |
| Outpatient visit due to cardiovascular causes                                                                                                                                                                                                                                            | 870 (12)   | 3,218 (13)  |
| Outpatient visit due to type 2 diabetes                                                                                                                                                                                                                                                  | 2,770 (39) | 8,029 (32)  |
| Outpatient visit due to other causes                                                                                                                                                                                                                                                     | 4,567 (64) | 15,201 (61) |
| <b>Diabetes drugs in the past 6 months</b>                                                                                                                                                                                                                                               |            |             |
| Metformin                                                                                                                                                                                                                                                                                | 5,542 (78) | 19,767 (79) |
| Sulphonylureas                                                                                                                                                                                                                                                                           | 1,720 (24) | 6,962 (28)  |
| Insulin                                                                                                                                                                                                                                                                                  | 1,729 (24) | 2,636 (11)  |
| GLP1 receptor agonists                                                                                                                                                                                                                                                                   | 1,229 (17) | 485 (2)     |
| Other antidiabetics (glitazones, glinides, acarbose)                                                                                                                                                                                                                                     | 155 (2)    | 325 (1)     |
| No diabetes drug                                                                                                                                                                                                                                                                         | 768 (11)   | 2,972 (12)  |
| <b>Time since first diabetes drug, years</b>                                                                                                                                                                                                                                             |            |             |
| <1                                                                                                                                                                                                                                                                                       | 1,158 (16) | 4,914 (20)  |
| 1-2                                                                                                                                                                                                                                                                                      | 882 (12)   | 3,588 (14)  |
| 3-4                                                                                                                                                                                                                                                                                      | 736 (10)   | 3,254 (13)  |
| 5-6                                                                                                                                                                                                                                                                                      | 804 (11)   | 3,123 (13)  |
| ≥7                                                                                                                                                                                                                                                                                       | 3,567 (50) | 10,049 (40) |
| <b>Other drugs in the past year</b>                                                                                                                                                                                                                                                      |            |             |
| ARB/ACE-I                                                                                                                                                                                                                                                                                | 4,321 (60) | 14,277 (57) |
| Calcium-channel blocker                                                                                                                                                                                                                                                                  | 1,607 (22) | 5,985 (24)  |
| Loop diuretic <sup>a</sup>                                                                                                                                                                                                                                                               | -          | -           |
| Other diuretic <sup>a</sup>                                                                                                                                                                                                                                                              | -          | -           |
| Beta-blocker                                                                                                                                                                                                                                                                             | 2,295 (32) | 8,372 (34)  |
| Digoxin                                                                                                                                                                                                                                                                                  | 75 (1)     | 399 (2)     |
| Nitrate                                                                                                                                                                                                                                                                                  | 419 (6)    | 1,564 (6)   |
| Platelet inhibitors                                                                                                                                                                                                                                                                      | 2,644 (37) | 9,305 (37)  |
| Anticoagulant                                                                                                                                                                                                                                                                            | 437 (6)    | 1,898 (8)   |
| Lipid lowering drug                                                                                                                                                                                                                                                                      | 4,395 (61) | 14,542 (58) |
| Antidepressant                                                                                                                                                                                                                                                                           | 1,022 (14) | 3,235 (13)  |
| Antipsychotic                                                                                                                                                                                                                                                                            | 343 (5)    | 1,151 (5)   |
| Anxiolytic, hypnotic, or sedative                                                                                                                                                                                                                                                        | 1,526 (21) | 5,172 (21)  |
| Beta-2 agonist inhalant                                                                                                                                                                                                                                                                  | 761 (11)   | 2,309 (9)   |
| Anticholinergic inhalant                                                                                                                                                                                                                                                                 | 267 (4)    | 989 (4)     |
| Glucocorticoid inhalant                                                                                                                                                                                                                                                                  | 785 (11)   | 2,427 (10)  |
| Oral glucocorticoid                                                                                                                                                                                                                                                                      | 607 (8)    | 2,338 (9)   |
| NSAID                                                                                                                                                                                                                                                                                    | 2,224 (31) | 6,751 (27)  |
| Opioid                                                                                                                                                                                                                                                                                   | 1,663 (23) | 5,341 (21)  |
| <b>Number of drugs used in the past year<sup>a</sup></b>                                                                                                                                                                                                                                 |            |             |
| 0-5                                                                                                                                                                                                                                                                                      | -          | -           |
| 6-10                                                                                                                                                                                                                                                                                     | -          | -           |
| 11-15                                                                                                                                                                                                                                                                                    | -          | -           |
| ≥16                                                                                                                                                                                                                                                                                      | -          | -           |
| Abbreviations: ACE-I, angiotensin converting enzyme inhibitor; ARB, angiotensin receptor blocker; COPD, chronic obstructive pulmonary disease; DDP4, dipeptidyl peptidase 4; NSAID, non-steroidal anti-inflammatory drug; SD, standard deviation; SGLT2 sodium-glucose co-transporter 2. |            |             |
| <sup>a</sup> Variable not available in Norway.                                                                                                                                                                                                                                           |            |             |
| <sup>b</sup> Year of cohort entry was not included in the propensity score.                                                                                                                                                                                                              |            |             |

**WebTable 10.** Baseline characteristics of new users of SGLT2 inhibitors and DPP4 inhibitors in **Sweden**, April, 2013, through December, 2016, **before matching**. All values are n (%) unless stated otherwise.

| <b>Characteristic</b>                                          | <b>SGLT2 inhibitors<br/>(n=10,515)</b> | <b>DPP4 inhibitors<br/>(n=42,399)</b> |
|----------------------------------------------------------------|----------------------------------------|---------------------------------------|
| Male sex                                                       | 6,595 (63)                             | 25,208 (59)                           |
| Age, mean (SD)                                                 | 62 (10)                                | 65 (11)                               |
| Place of birth                                                 |                                        |                                       |
| Scandinavia                                                    | 8,881 (84)                             | 34,249 (81)                           |
| Rest of Europe                                                 | 753 (7)                                | 3,584 (8)                             |
| Outside Europe                                                 | 881 (8)                                | 4,547 (11)                            |
| Missing                                                        | 0 (0)                                  | 19 (0)                                |
| Civil status                                                   |                                        |                                       |
| Married/living with partner                                    | 5,340 (51)                             | 22,785 (54)                           |
| Single                                                         | 5,156 (49)                             | 19,427 (46)                           |
| Missing                                                        | 19 (0)                                 | 187 (0)                               |
| Education                                                      |                                        |                                       |
| Primary-/secondary school/vocational training                  | 8,117 (77)                             | 33,441 (79)                           |
| Short tertiary education                                       | 1,088 (10)                             | 3,866 (9)                             |
| Medium or long tertiary education                              | 1,182 (11)                             | 4,199 (10)                            |
| Missing                                                        | 128 (1)                                | 893 (2)                               |
| Year of cohort entry <sup>a</sup>                              |                                        |                                       |
| 2013                                                           | 448 (4)                                | 5,974 (14)                            |
| 2014                                                           | 1,958 (19)                             | 9,440 (22)                            |
| 2015                                                           | 3,347 (32)                             | 12,601 (30)                           |
| 2016                                                           | 4,762 (45)                             | 14,384 (34)                           |
| <b>Comorbidities</b>                                           |                                        |                                       |
| Acute coronary syndrome                                        | 945 (9)                                | 3,458 (8)                             |
| Other ischemic heart disease                                   | 1,898 (18)                             | 7,110 (17)                            |
| Heart failure/cardiomyopathy                                   | 691 (7)                                | 3,100 (7)                             |
| Valve disorders                                                | 200 (2)                                | 1,081 (3)                             |
| Stroke                                                         | 409 (4)                                | 2,021 (5)                             |
| Other cerebrovascular disease                                  | 475 (5)                                | 2,199 (5)                             |
| Atrial fibrillation                                            | 796 (8)                                | 3,855 (9)                             |
| Other arrhythmia                                               | 441 (4)                                | 1,819 (4)                             |
| Coronary revascularization in the past year                    | 181 (2)                                | 569 (1)                               |
| Other cardiac surgery or invasive procedure in the past year   | 93 (1)                                 | 363 (1)                               |
| COPD                                                           | 300 (3)                                | 1,472 (3)                             |
| Other lung disease                                             | 836 (8)                                | 3,091 (7)                             |
| Venous thromboembolism                                         | 280 (3)                                | 1,178 (3)                             |
| Cancer                                                         | 705 (7)                                | 3,919 (9)                             |
| Liver disease                                                  | 241 (2)                                | 813 (2)                               |
| Rheumatic disease                                              | 299 (3)                                | 1,448 (3)                             |
| Psychiatric disorder                                           | 1,359 (13)                             | 5,119 (12)                            |
| Fracture in the past year                                      | 194 (2)                                | 762 (2)                               |
| Arterial disease (including amputation)                        | 528 (5)                                | 2,046 (5)                             |
| Renal disease                                                  | 476 (5)                                | 2,283 (5)                             |
| Diabetic complications                                         | 3,378 (32)                             | 9,904 (23)                            |
| <b>Hospitalizations and outpatient visits in the past year</b> |                                        |                                       |

|                                                                                                                                                                                                                                                                                          |            |             |
|------------------------------------------------------------------------------------------------------------------------------------------------------------------------------------------------------------------------------------------------------------------------------------------|------------|-------------|
| Hospitalization due to cardiovascular causes                                                                                                                                                                                                                                             | 451 (4)    | 1,965 (5)   |
| Hospitalization due to type 2 diabetes                                                                                                                                                                                                                                                   | 69 (1)     | 304 (1)     |
| Hospitalization due to other causes                                                                                                                                                                                                                                                      | 1,110 (11) | 4,924 (12)  |
| Outpatient visit due to cardiovascular causes                                                                                                                                                                                                                                            | 1,039 (10) | 4,145 (10)  |
| Outpatient visit due to type 2 diabetes                                                                                                                                                                                                                                                  | 1,762 (17) | 4,133 (10)  |
| Outpatient visit due to other causes                                                                                                                                                                                                                                                     | 5,300 (50) | 21,400 (50) |
| <b>Diabetes drugs in the past 6 months</b>                                                                                                                                                                                                                                               |            |             |
| Metformin                                                                                                                                                                                                                                                                                | 8,065 (77) | 32,034 (76) |
| Sulphonylureas                                                                                                                                                                                                                                                                           | 1,963 (19) | 9,489 (22)  |
| Insulin                                                                                                                                                                                                                                                                                  | 4,709 (45) | 9,659 (23)  |
| GLP1 receptor agonists                                                                                                                                                                                                                                                                   | 2,127 (20) | 829 (2)     |
| Other antidiabetics (glitazones, glinides, acarbose)                                                                                                                                                                                                                                     | 623 (6)    | 2,098 (5)   |
| No diabetes drug                                                                                                                                                                                                                                                                         | 585 (6)    | 4,558 (11)  |
| <b>Time since first diabetes drug, years</b>                                                                                                                                                                                                                                             |            |             |
| <1                                                                                                                                                                                                                                                                                       | 852 (8)    | 5,520 (13)  |
| 1-2                                                                                                                                                                                                                                                                                      | 1,083 (10) | 5,807 (14)  |
| 3-4                                                                                                                                                                                                                                                                                      | 1,167 (11) | 6,143 (14)  |
| 5-6                                                                                                                                                                                                                                                                                      | 1,289 (12) | 5,933 (14)  |
| ≥7                                                                                                                                                                                                                                                                                       | 6,124 (58) | 18,996 (45) |
| <b>Other drugs in the past year</b>                                                                                                                                                                                                                                                      |            |             |
| ARB/ACE-I                                                                                                                                                                                                                                                                                | 7,448 (71) | 28,413 (67) |
| Calcium-channel blocker                                                                                                                                                                                                                                                                  | 3,567 (34) | 14,432 (34) |
| Loop diuretic                                                                                                                                                                                                                                                                            | 1,537 (15) | 6,715 (16)  |
| Other diuretic                                                                                                                                                                                                                                                                           | 1,651 (16) | 6,911 (16)  |
| Beta-blocker                                                                                                                                                                                                                                                                             | 4,537 (43) | 18,281 (43) |
| Digoxin                                                                                                                                                                                                                                                                                  | 218 (2)    | 1,012 (2)   |
| Nitrate                                                                                                                                                                                                                                                                                  | 1,024 (10) | 3,669 (9)   |
| Platelet inhibitors                                                                                                                                                                                                                                                                      | 3,754 (36) | 14,731 (35) |
| Anticoagulant                                                                                                                                                                                                                                                                            | 774 (7)    | 3,911 (9)   |
| Lipid lowering drug                                                                                                                                                                                                                                                                      | 7,358 (70) | 28,093 (66) |
| Antidepressant                                                                                                                                                                                                                                                                           | 1,815 (17) | 6,435 (15)  |
| Antipsychotic                                                                                                                                                                                                                                                                            | 261 (2)    | 1,253 (3)   |
| Anxiolytic, hypnotic, or sedative                                                                                                                                                                                                                                                        | 2,062 (20) | 8,445 (20)  |
| Beta-2 agonist inhalant                                                                                                                                                                                                                                                                  | 1,027 (10) | 3,560 (8)   |
| Anticholinergic inhalant                                                                                                                                                                                                                                                                 | 273 (3)    | 1,365 (3)   |
| Glucocorticoid inhalant                                                                                                                                                                                                                                                                  | 1,103 (10) | 4,054 (10)  |
| Oral glucocorticoid                                                                                                                                                                                                                                                                      | 798 (8)    | 3,596 (8)   |
| NSAID                                                                                                                                                                                                                                                                                    | 2,323 (22) | 7,898 (19)  |
| Opioid                                                                                                                                                                                                                                                                                   | 1,932 (18) | 6,730 (16)  |
| <b>Number of drugs used in the past year</b>                                                                                                                                                                                                                                             |            |             |
| 0-5                                                                                                                                                                                                                                                                                      | 1,639 (16) | 8,908 (21)  |
| 6-10                                                                                                                                                                                                                                                                                     | 3,949 (38) | 16,445 (39) |
| 11-15                                                                                                                                                                                                                                                                                    | 2,893 (28) | 10,150 (24) |
| ≥16                                                                                                                                                                                                                                                                                      | 2,034 (19) | 6,896 (16)  |
| Abbreviations: ACE-I, angiotensin converting enzyme inhibitor; ARB, angiotensin receptor blocker; COPD, chronic obstructive pulmonary disease; DDP4, dipeptidyl peptidase 4; NSAID, non-steroidal anti-inflammatory drug; SD, standard deviation; SGLT2 sodium-glucose co-transporter 2. |            |             |
| ªYear of cohort entry was not included in the propensity score.                                                                                                                                                                                                                          |            |             |



**WebTable 11.** Distribution of person-years of follow-up by individual DPP4 inhibitors.

| <b>DPP4 inhibitor</b> | <b>Person-years, n (%)</b> |
|-----------------------|----------------------------|
| Any                   | 36,793 (100)               |
| Saxagliptin           | 24,869 (68)                |
| Vildagliptin          | 6735 (18)                  |
| Linagliptin           | 3537 (10)                  |
| Saxagliptin           | 1323 (4)                   |
| Alogliptin            | 329 (1)                    |

**WebTable 12.** Reasons for censoring in analyses of co-primary outcomes. All values are n (%)

| Reason for censoring                                             | SGLT2 inhibitor<br>(n=20,983) | DPP inhibitor<br>(n=20,983) |
|------------------------------------------------------------------|-------------------------------|-----------------------------|
| <b>Primary analyses (intention-to-treat exposure definition)</b> |                               |                             |
| <b><i>Major cardiovascular events</i></b>                        |                               |                             |
| End of study period                                              | 20,215 (96.3)                 | 19,853 (94.6)               |
| Outcome event                                                    | 467 (2.2)                     | 662 (3.2)                   |
| Death                                                            | 175 (0.8)                     | 307 (1.5)                   |
| Age 85 years                                                     | 91 (0.4)                      | 122 (0.6)                   |
| Emigration                                                       | 35 (0.2)                      | 39 (0.2)                    |
| <b><i>Heart failure</i></b>                                      |                               |                             |
| End of study period                                              | 20,462 (97.5)                 | 20,122 (95.9)               |
| Outcome event                                                    | 130 (0.6)                     | 265 (1.3)                   |
| Death                                                            | 265 (1.3)                     | 435 (2.1)                   |
| Age 85 years                                                     | 92 (0.4)                      | 122 (0.6)                   |
| Emigration                                                       | 34 (0.2)                      | 39 (0.2)                    |
| <b>Additional analyses (as-treated exposure definition)</b>      |                               |                             |
| <b><i>Major cardiovascular events</i></b>                        |                               |                             |
| End of study period                                              | 12,568 (59.9)                 | 11,154 (53.2)               |
| Outcome event                                                    | 281 (1.3)                     | 433 (2.1)                   |
| Death                                                            | 95 (0.5)                      | 151 (0.7)                   |
| Age 85 years                                                     | 50 (0.2)                      | 88 (0.4)                    |
| Emigration                                                       | 17 (0.1)                      | 21 (0.1)                    |
| End of treatment                                                 | 6253 (29.8)                   | 7156 (34.1)                 |
| Cross-over to the other study drug <sup>a</sup>                  | 1719 (8.2)                    | 1980 (9.4)                  |
| <b><i>Heart failure</i></b>                                      |                               |                             |
| End of study period                                              | 12,671 (60.4)                 | 11,246 (53.6)               |
| Outcome event                                                    | 73 (0.3)                      | 172 (0.8)                   |
| Death                                                            | 150 (0.7)                     | 248 (1.2)                   |
| Age 85 years                                                     | 51 (0.2)                      | 87 (0.4)                    |
| Emigration                                                       | 17 (0.1)                      | 21 (0.1)                    |
| End of treatment                                                 | 6298 (30.0)                   | 7218 (34.4)                 |
| Cross-over to the other study drug <sup>a</sup>                  | 1723 (8.2)                    | 1991 (9.5)                  |

<sup>a</sup>Initiation of DPP4 inhibitor among SGLT2 inhibitor users and vice versa (may represent treatment switch or add-on).

**WebTable 13.** Risk of co-primary outcomes associated with use of SGLT2 inhibitors, compared with DPP4 inhibitors, according to study country

|                                    | SGLT2 inhibitors<br>(n=20,983) |                                                        | DPP4 inhibitors<br>(n=20,983) |                                                        | Hazard ratio<br>(95% CI) |
|------------------------------------|--------------------------------|--------------------------------------------------------|-------------------------------|--------------------------------------------------------|--------------------------|
|                                    | Events                         | Incidence rate,<br>events per<br>1000 person-<br>years | Events                        | Incidence rate,<br>events per<br>1000 person-<br>years |                          |
| <b>Major cardiovascular events</b> |                                |                                                        |                               |                                                        |                          |
| Denmark                            | 91                             | 12.7                                                   | 163                           | 15.8                                                   | 0.80 (0.62-1.04)         |
| Norway                             | 153                            | 16.8                                                   | 215                           | 18.2                                                   | 0.93 (0.75-1.15)         |
| Sweden                             | 223                            | 20.0                                                   | 284                           | 19.3                                                   | 1.01 (0.85-1.21)         |
| <b>Heart failure</b>               |                                |                                                        |                               |                                                        |                          |
| Denmark                            | 30                             | 4.2                                                    | 66                            | 6.4                                                    | 0.68 (0.44-1.05)         |
| Norway                             | 30                             | 3.3                                                    | 79                            | 6.6                                                    | 0.48 (0.31-0.73)         |
| Sweden                             | 70                             | 6.2                                                    | 120                           | 8.1                                                    | 0.77 (0.57-1.04)         |

**WebTable 14.** Multiple imputation estimates of hazard ratios for major cardiovascular events and heart failure associated with use of SGLT2 inhibitors, HbA1c, blood pressure, eGFR, albuminuria, body mass index, and smoking. The analysis was carried out as a multivariable model in the matched cohort in Sweden.

|                                           | <b>Major cardiovascular events</b> | <b>Heart failure</b>         |
|-------------------------------------------|------------------------------------|------------------------------|
|                                           | <b>Hazard ratio (95% CI)</b>       | <b>Hazard ratio (95% CI)</b> |
| <b>Treatment</b>                          |                                    |                              |
| DPP4 inhibitors                           | 1.00 (ref.)                        | 1.00 (ref.)                  |
| SGLT2 inhibitors                          | 1.04 (0.87-1.24)                   | 0.83 (0.61-1.12)             |
| <b>HbA1c (%)</b>                          |                                    |                              |
| ≤ 6.9                                     | 1.00 (ref.)                        | 1.00 (ref.)                  |
| 7.0-7.8                                   | 0.89 (0.55-1.44)                   | 0.70 (0.32-1.54)             |
| 7.9-8.7                                   | 1.10 (0.73-1.66)                   | 0.90 (0.46-1.76)             |
| 8.8-9.6                                   | 1.36 (0.87-2.12)                   | 1.10 (0.54-2.24)             |
| ≥9.7                                      | 1.52 (1.00-2.30)                   | 1.53 (0.74-3.16)             |
| <b>Blood pressure (mmHg)</b>              |                                    |                              |
| SBP < 140 and DBP < 90                    | 1.00 (ref.)                        | 1.00 (ref.)                  |
| SBP 140-159 OR DBP 90-99                  | 1.06 (0.85-1.32)                   | 0.97 (0.67-1.40)             |
| SBP ≥160 OR DBP ≥100                      | 1.11 (0.81-1.53)                   | 1.28 (0.78-2.11)             |
| <b>Albuminuria</b>                        |                                    |                              |
| Normalalbuminuria                         | 1.00 (ref.)                        | 1.00 (ref.)                  |
| Microalbuminuria                          | 1.12 (0.89-1.41)                   | 1.63 (1.12-2.38)             |
| Macroalbuminuria                          | 2.07 (1.50-2.86)                   | 2.36 (1.44-3.87)             |
| <b>eGFR (ml/min)</b>                      |                                    |                              |
| ≥90                                       | 1.00 (ref.)                        | 1.00 (ref.)                  |
| ≥60 to 89                                 | 1.41 (1.13-1.77)                   | 2.43 (1.57-3.77)             |
| <60                                       | 2.37 (1.77-3.16)                   | 6.63 (4.24-10.35)            |
| <b>Body mass index (kg/m<sup>2</sup>)</b> |                                    |                              |
| <25                                       | 1.00 (ref.)                        | 1.00 (ref.)                  |
| 25-29                                     | 0.87 (0.58-1.31)                   | 1.40 (0.47-4.18)             |
| 30-34                                     | 0.90 (0.61-1.32)                   | 1.75 (0.54-5.66)             |
| ≥35                                       | 0.90 (0.59-1.37)                   | 2.41 (0.83-7.02)             |
| <b>Current smoking</b>                    |                                    |                              |
| No                                        | 1.00 (ref.)                        | 1.00 (ref.)                  |
| Yes                                       | 1.46 (1.12-1.90)                   | 1.41 (0.95-2.09)             |

**WebTable 15.** Post-hoc sensitivity analyses

|                                                                                                                     | SGLT2 inhibitors<br>(n=20,983) |                                                        | DPP4 inhibitors<br>(n=20,983) |                                                        | Hazard ratio<br>(95% CI) |
|---------------------------------------------------------------------------------------------------------------------|--------------------------------|--------------------------------------------------------|-------------------------------|--------------------------------------------------------|--------------------------|
|                                                                                                                     | Events                         | Incidence rate,<br>events per<br>1000 person-<br>years | Events                        | Incidence rate,<br>events per<br>1000 person-<br>years |                          |
| <b>Additional adjustment for<br/>country (primary analyses<br/>with intention-to-treat<br/>exposure definition)</b> |                                |                                                        |                               |                                                        |                          |
| Major cardiovascular events                                                                                         | 467                            | 17.0                                                   | 662                           | 18.0                                                   | 0.94 (0.83 to 1.06)      |
| Heart failure                                                                                                       | 130                            | 4.7                                                    | 265                           | 7.1                                                    | 0.66 (0.53 to 0.81)      |
| <b>Gap period 30 days<br/>(additional analyses with<br/>as-treated exposure<br/>definition)</b>                     |                                |                                                        |                               |                                                        |                          |
| Major cardiovascular events                                                                                         | 208                            | 14.5                                                   | 299                           | 16.7                                                   | 0.85 (0.71 to 1.02)      |
| Heart failure                                                                                                       | 46                             | 3.2                                                    | 133                           | 7.4                                                    | 0.43 (0.31 to 0.60)      |
| <b>Gap period 60 days<br/>(additional analyses with<br/>as-treated exposure<br/>definition)</b>                     |                                |                                                        |                               |                                                        |                          |
| Major cardiovascular events                                                                                         | 250                            | 14.5                                                   | 384                           | 17.1                                                   | 0.83 (0.71 to 0.98)      |
| Heart failure                                                                                                       | 63                             | 3.6                                                    | 156                           | 6.9                                                    | 0.51 (0.38 to 0.69)      |

**WebTable 16.** Supplementary serious adverse event outcomes

|                       | <b>SGLT2 inhibitors<br/>(n=20,983)</b> |                                                                  | <b>DPP4 inhibitors<br/>(n=20,983)</b> |                                                                  | <b>Hazard ratio (95%<br/>CI)</b> |
|-----------------------|----------------------------------------|------------------------------------------------------------------|---------------------------------------|------------------------------------------------------------------|----------------------------------|
|                       | <b>Events</b>                          | <b>Incidence rate,<br/>events per<br/>1000 person-<br/>years</b> | <b>Events</b>                         | <b>Incidence rate,<br/>events per<br/>1000 person-<br/>years</b> |                                  |
| Lower limb amputation | 59                                     | 3.1                                                              | 64                                    | 2.6                                                              | 1.26 (0.88 to 1.81)              |
| Diabetic ketoacidosis | 27                                     | 1.4                                                              | 16                                    | 0.6                                                              | 2.14 (1.17 to 4.09)              |
